# Supplementary material for: Kinase-Associated Phosphoisoform Assay: a novel candidate-based method to detect specific kinase-substrate phosphorylation interactions in vivo
Source: PubMed Central journal article supplement (PMC5031308; doi:10.1186/s12870-016-0894-1), 2016-09-21
Supplement: 12870_2016_894_MOESM1_ESM.pdf [file 12870_2016_894_MOESM1_ESM.pdf]

| MOTIF                                                                 | POSITION                | SEQUENCE                      | ELM ACCESSION           |
|-----------------------------------------------------------------------|-------------------------|-------------------------------|-------------------------|
| D-site MAPK docking motif                                             | 22-32                   | KKKCWQSNLRL                   | (similar to ELME000233) |
| Protein phosphatase-1 (PP1) docking motif RVXF                        | 29-35                   | NLRLSFS                       | ELME000137              |
| Pro-directed kinase (MAP kinase) Phosphorylation Site                 | 43-49<br>46-52<br>51-57 | GFFSPHS<br>SPHSPVP<br>VPPSPLV | ELME000159              |
| Casein kinase (CK) 1 Phosphorylation site                             | 46-52                   | SPHSPVP                       | ELME000063              |
| GSK3 phosphorylation recognition site                                 | 30-37                   | LRLSFSDT                      | ELME000053              |
| Never in mitosis A (NimA)-related kinase (NEK) 2 phosphorylation site | 12-17<br>30-35<br>34-39 | MAATTM<br>LRLSFS<br>FSDTRR    | ELME000336              |
| protein kinase A (PKA) Phosphorylation site                           | 30-36                   | LRLSFSD                       | ELME000062              |

#### Additional File 1 Table S1

Putative kinase and phosphatase interaction (docking) and phosphorylation motifs in the C-terminal domain (pos. 435-495) of ACS6 (1-AMINOCYCLOPROPANE-1-CARBOXYLIC ACID (ACC) SYNTHASE 6). Linear motif search was carried out using the Eukaryotic Linear Motif (ELM) Resource. Putative phosphorylated residues are indicated with red font. Furthermore, the sequence contains a putative D-site MAPK docking motif. This motif contains five spacer residues between the basic cluster and the bulky hydrophobic amino acids, thus falling short of the ELM definition of 2-4 spacers. It is nonetheless commonly accepted that the D-site consensus consists of 1-6 spacer amino acids.
