# Supplementary material for: Kinase-Associated Phosphoisoform Assay: a novel candidate-based method to detect specific kinase-substrate phosphorylation interactions in vivo
Source: PubMed Central journal article supplement (PMC5031308; doi:10.1186/s12870-016-0894-1), 2016-09-21
Supplement: 12870_2016_894_MOESM9_ESM.pdf [file 12870_2016_894_MOESM9_ESM.pdf]

| MOTIF                                                                                                    | POSITION                                                                        | SEQUENCE                                                                                   | ELM ACCESSION |
|----------------------------------------------------------------------------------------------------------|---------------------------------------------------------------------------------|--------------------------------------------------------------------------------------------|---------------|
| MAPK docking motif                                                                                       | 315-323<br>245-252*                                                             | KHKSQDMRL<br>KKYVYLGL                                                                      | ELME000233    |
| Protein phosphatase-1 (PP1) docking motif                                                                | 131-138*                                                                        | QYRGVTFY                                                                                   | ELME000137    |
| Phospho-dependent motif that mediates docking of CDK substrates and regulators to cyclin-CDK-bound Cks1. | 296-301                                                                         | PTTPQD                                                                                     | ELME000358    |
| Pro-directed kinase (MAP kinase) Phosphorylation Site                                                    | 21-27<br>295-301<br>347-353<br>397-403<br>410-416                               | CYSSPSK<br>NPTTPQD<br>LNHTPNS<br>SGFSPHH<br>STSTPHQ                                        | ELME000159    |
| Cyclin dependent protein kinase (CDK) Phosphorylation Site                                               | 21-27                                                                           | CYSSPSK                                                                                    | ELME000153    |
| CK1 phosphorylation site                                                                                 | 23-29<br>33-39<br>35-41<br>311-317<br>332-338<br>397-403<br>410-416<br>127-133* | SSPSKRV<br>SNSSSSA<br>SSSSAVV<br>SANSKHK<br>SLHSNEV<br>SGFSPHH<br>STSTPHQ<br>SRSSQYR       | ELME000063    |
| CK2 Phosphorylation site                                                                                 | 8-14<br>199-205<br>252-258*                                                     | PHQTQRE<br>TNLTKEE<br>LFDTEVE                                                              | ELME000064    |
| GSK3 phosphorylation recognition site                                                                    | 28-35<br>30-37<br>90-97<br>290-297<br>304-311<br>311-318<br>358-365<br>393-400  | RVGSFSNS<br>GSFSNSSS<br>FCQSDLAT<br>AESGNPT<br>LDLSLGN<br>SANSKHKS<br>PGSSNIGS<br>AAASSGFS | ELME000053    |
| NEK2 phosphorylation site                                                                                | 20-25<br>32-37<br>118-123<br>304-309<br>308-313<br>341-346<br>408-413           | FCYSSP<br>FSNSSS<br>LKKRRR<br>LDLSLG<br>LGNAN<br>LGQTGM<br>FNSTST                          | ELME000336    |
| NEK2 phosphorylation site                                                                                | 367-372                                                                         | GGFSLF                                                                                     | ELME000337    |
| phosphoinositide-3-OH-kinase related kinase (PIKK) phosphorylation site                                  | 8-14<br>315-321<br>127-133*                                                     | PHQTQRE<br>KHKSQDM<br>SRSSQYR                                                              | ELME000202    |
| PKA Phosphorylation site                                                                                 | 211-217                                                                         | RRQSTGF                                                                                    | ELME000008    |

|                                       |                                                        |                                                                                                 |            |
|---------------------------------------|--------------------------------------------------------|-------------------------------------------------------------------------------------------------|------------|
| PKA Phosphorylation site              | 211-217<br>382-388<br>127-133*<br>138-144*<br>218-224* | RRQ <b>S</b> TGF<br>GRA <b>S</b> TNQ<br>SR <b>S</b> QYR<br>YRR <b>T</b> GRW<br>PRG <b>S</b> SKY | ELME000062 |
| Polo-like kinase phosphorylation site | 304-310<br>279-285*                                    | LDL <b>S</b> LGN<br>FDP <b>S</b> IYD                                                            | ELME000147 |

#### **Additional File 9 Table S4**

Putative kinase and phosphatase interaction (docking) and phosphorylation motifs in the APETALA 2 (At4g36920.1) protein sequence (432 amino acids). Linear motif search was carried out using ELM. Motifs falling inside SMART/Pfam domains or scoring poorly with the structural filter of ELM are indicated with asterisks. Putative phosphorylated residues are indicated with red font.
